# Supplementary material
Source: PubMed Central journal article supplement (PMC7953094)
Supplement: sj-pdf-1-vdi-10.1177_1040638720978172.pdf [file sj-pdf-1-vdi-10.1177_1040638720978172.pdf]

O'Brien KM, et al. Clinical, histopathologic, and immunohistochemical features of 13 cases of canine gallbladder neuroendocrine carcinoma

**Supplementary Table 1.** Clinical pathology results.

| Case | Clinical signs                            | ALT (U/L)                                   | AST (U/L)                      | ALP (U/L)                                 | GGT (U/L)                      | Culture and susceptibility of gallbladder                          |
|------|-------------------------------------------|---------------------------------------------|--------------------------------|-------------------------------------------|--------------------------------|--------------------------------------------------------------------|
| 1    | Emesis, hematemesis, abdominal distention | Elevated (no record available)              | Elevated (no record available) | Elevated (no record available)            | Elevated (no record available) | Yes; no results listed                                             |
| 2    | Emesis, hematemesis, abdominal distension | 276 (10–100)                                | —                              | 1558 (23–212)                             | —                              | No growth                                                          |
| 3    | Emesis                                    | 252 (10–118)                                | 220 (10–40)                    | 983 (20–150)                              | —                              | Yes; <i>E. coli</i> heavy; <i>Enterococcus</i> moderate            |
| 4    | Emesis, hematemesis                       | 534 (5–107)                                 | 202 (5–55)                     | 112 (10–150)                              | 30 (0–14)                      | Yes; <i>E. coli</i> heavy; <i>Enterococcus</i> light               |
| 5    | Emesis, diarrhea                          | 78 (12–118)                                 | 52 (15–66)                     | 786 (5–131)                               | 11 (1–12)                      | Yes; scant growth of coagulase-negative <i>Staphylococcus</i> spp. |
| 6    | Hematuria, hematemesis                    | 348 (0–120); 4282 one month prior to biopsy | Elevated 1 mo prior to biopsy  | 83 (0–140); elevated 1 mo prior to biopsy | 31 (0–14)                      | Yes; negative growth                                               |
| 7    | None                                      | 92 (16–91)                                  | 55 (23–65)                     | 228 (20–155)                              | 8 (7–24)                       | —                                                                  |
| 8    | Emesis, pain, anorexia                    | 219 (12–118)                                | —                              | 281 (5–131)                               | —                              | Yes; negative growth                                               |
| 9    | None                                      | Elevated (no record available)              | Elevated (no record available) | Elevated (no record available)            | Elevated (no record available) | —                                                                  |

Features of canine gallbladder neuroendocrine carcinoma

|    |                  |               |             |              |           |                      |
|----|------------------|---------------|-------------|--------------|-----------|----------------------|
| 10 | Emesis           | 360 (12–118)  | —           | 904 (5–131)  | 22 (1–12) | —                    |
| 11 | Emesis           | 261 (12–118)  | 42 (15–66)  | 179 (5–131)  | —         | —                    |
| 12 | Emesis, diarrhea | 102 (10–125)  | —           | 120 (23–212) | —         | —                    |
| 13 | Emesis, anorexia | 2166 (12–118) | 328 (15–66) | 818 (5–131)  | —         | Yes; negative growth |

ALP = alkaline phosphatase; ALT = alanine aminotransferase; AST = aspartate aminotransferase; GGT = gamma-glutamyl

transferase. Dash (—) = not reported. Numbers in parentheses are reference intervals.

**Supplementary Table 2.** Histologic characteristics of the neoplasm and relevant gallbladder and liver lesions.

| Case | Pleomorphism              | Necrosis | Mitotic count | Hemorrhage | Vascular invasion | Margins | Gallbladder findings                                                                                              | Liver findings                                                                         |
|------|---------------------------|----------|---------------|------------|-------------------|---------|-------------------------------------------------------------------------------------------------------------------|----------------------------------------------------------------------------------------|
| 1    | Marked with karyomegaly   | Yes      | 10            | Yes        | Yes               | Clean   | Inspissated bile/choleliths                                                                                       | Ductal bile stasis; mild neutrophilic lymphoplasmacytic cholangitis                    |
| 2    | Marked with karyomegaly   | No       | 6             | Yes        | Yes               | Clean   | No significant lesions reported                                                                                   | Not biopsied                                                                           |
| 3    | Marked with karyomegaly   | Yes      | 3             | Yes        | Yes               | Clean   | Cystic mucosal hyperplasia; moderate chronic cholecystitis; inspissated bile/choleliths; bacteria; mineralization | Severe neutrophilic cholangitis; bile duct hyperplasia & fibrosis; portal fibrosis     |
| 4    | Marked with karyomegaly   | Yes      | 4             | Yes        | Yes               | Clean   | Mild chronic cholecystitis                                                                                        | Mild lymphoplasmacytic cholangitis; minimal bile duct hyperplasia                      |
| 5    | Marked with karyomegaly   | No       | 9             | No         | Yes               | Clean   | Mild cystic mucosal hyperplasia; mild lymphoplasmacytic cholecystitis                                             | Nodular hyperplasia                                                                    |
| 6    | Moderate (no karyomegaly) | No       | 4             | Yes        | No                | Clean   | Mild chronic cholecystitis                                                                                        | Mild steroid hepatopathy; mild chronic neutrophilic cholangitis; bile duct hyperplasia |

Features of canine gallbladder neuroendocrine carcinoma

|    |                                                                    |     |    |     |     |       |                                                                                                                                    |                                                                           |
|----|--------------------------------------------------------------------|-----|----|-----|-----|-------|------------------------------------------------------------------------------------------------------------------------------------|---------------------------------------------------------------------------|
| 7  | Moderate (no karyomegaly)                                          | No  | 8  | Yes | Yes | Clean | Mild chronic cholecystitis, inspissated bile; cholelith; cholangitis; cystic mucosal hyperplasia & fibrosis                        | Nodular hyperplasia                                                       |
| 8  | Moderate-to-marked (no karyomegaly)                                | Yes | 2  | Yes | No  | Clean | Mucocele                                                                                                                           | Not biopsied                                                              |
| 9  | Marked (no karyomegaly)                                            | No  | 12 | Yes | No  | Clean | Cystic mucosal hyperplasia; moderate chronic lymphoplasmacytic cholecystitis; inspissated bile/cholelith; bacteria; mineralization | Mild chronic-active cholangitis; severe steroid hepatopathy               |
| 10 | Mild (no karyomegaly)                                              | Yes | 13 | Yes | No  | Clean | Choleliths; cystic mucosal hyperplasia                                                                                             | Bile duct hyperplasia, fibrosis, & stasis; mild chronic cholangitis       |
| 11 | Mild (no karyomegaly)                                              | Yes | 11 | Yes | Yes | Clean | Inspissated bile                                                                                                                   | Moderate hepatocellular swelling & clearing; ductal bile stasis; fibrosis |
| 12 | Marked with karyomegaly and cytoplasmic intranuclear invaginations | No  | 10 | No  | No  | Clean | Mild chronic choledochitis                                                                                                         | Not biopsied                                                              |
| 13 | Moderate pleomorphism with slight karyomegaly                      | Yes | 12 | Yes | Yes | Dirty | Moderate chronic lymphoplasmacytic & neutrophilic cholecystitis; cystic mucosal hyperplasia                                        | Effaced by tumor with scattered remnant bile ductules                     |
